# Supplementary material
Source: PubMed Central journal article supplement (PMC3701733)
Supplement: NIHMS476402-supplement-supplement_1.pdf [file NIHMS476402-supplement-supplement_1.pdf]

**Supplement Table 1.** Characteristics of women in first generation (G1) and second generation (G2) stratified according to available information on smoking behavior in Medical Birth Register. Subjects not restricted to having a valid BMI or birthweight.

|                                                 | First generation (G1)             |                                  | Second generation (G2)           |                                |
|-------------------------------------------------|-----------------------------------|----------------------------------|----------------------------------|--------------------------------|
|                                                 | Complete smoking data<br>n=83 415 | Missing smoking data<br>n=16 760 | Complete smoking data<br>n=96100 | Missing smoking data<br>n=4071 |
| <b>Age at childbirth (yrs)</b>                  |                                   |                                  |                                  |                                |
| <20                                             | 6247 (7.5)                        | 1325 (7.9)                       | 11924 (12.4)                     | 735 (18.1)                     |
| 20-24                                           | 29928 (35.9)                      | 5562 (33.2)                      | 53608 (55.8)                     | 2386 (58.6)                    |
| 25-29                                           | 27474 (32.9)                      | 5678 (33.9)                      | 30568 (31.8)                     | 946 (23.2)                     |
| >30                                             | 19766 (23.6)                      | 4195 (25.0)                      | -                                | -                              |
| <b>Body Mass Index (BMI) (kg/m<sup>2</sup>)</b> |                                   |                                  |                                  |                                |
| <18                                             | 3672 (6.1)                        | 411 (6.7)                        | 2105 (2.3)                       | 14 (2.4)                       |
| 18-24                                           | 46002 (76.5)                      | 4724 (76.7)                      | 55478 (60.9)                     | 358 (60.3)                     |
| 25-29                                           | 8544 (14.2)                       | 815 (13.2)                       | 21265 (23.4)                     | 135 (22.7)                     |
| >30                                             | 1877 (3.1)                        | 209 (3.13)                       | 12203 (13.3)                     | 87 (14.7)                      |
| Total valid                                     | 60095                             | 6159                             | 91051                            | 594                            |
| Missing                                         | 23320                             | 10601                            | 5049                             | 3477                           |
| <b>Parity</b>                                   |                                   |                                  |                                  |                                |
| 1                                               | 32790 (39.3)                      | 6677 (39.8)                      | 69123 (71.9)                     | 2938 (72.2)                    |
| 2                                               | 27705 (33.2)                      | 5767 (34.4)                      | 23147 (24.1)                     | 952 (23.4)                     |
| 3 or higher                                     | 22920 (27.5)                      | 4316 (25.8)                      | 3830 (4.0)                       | 182 (4.4)                      |
| <b>Gestational diabetes (GDM)<sup>a</sup></b>   |                                   |                                  |                                  |                                |
| No                                              | 17256 (99.5)                      | 1521 (99.3)                      | 95585 (99.5)                     | 4045 (99.5)                    |
| Yes                                             | 88 (0.5)                          | 10 (0.7)                         | 515 (0.5)                        | 22 (0.5)                       |
| <b>Non-gestational diabetes<sup>b</sup></b>     |                                   |                                  |                                  |                                |
| No                                              | 83073 (99.6)                      | 16713 (99.7)                     | 95605 (99.5)                     | 4039 (99.2)                    |
| Yes                                             | 342 (0.4)                         | 47 (0.3)                         | 495 (0.5)                        | 32 (0.8)                       |

<sup>a)</sup> Gestational diabetes recorded since 1987.

<sup>b)</sup> Medical Birth Register does not distinguish between type 1 and type 2 diabetes mellitus.
